# Supplementary material for: Actin-related protein 2/3 complex subunit 1B promotes ovarian cancer progression by regulating the AKT/PI3K/mTOR signaling pathway
Source: publisher site journal article supplement (doi:10.2478/jtim-2024-0025), 2024-09-01
Supplement: Supplementary file 1 [file jtim-2024-0025_sm.pdf]

## Supplementary Material

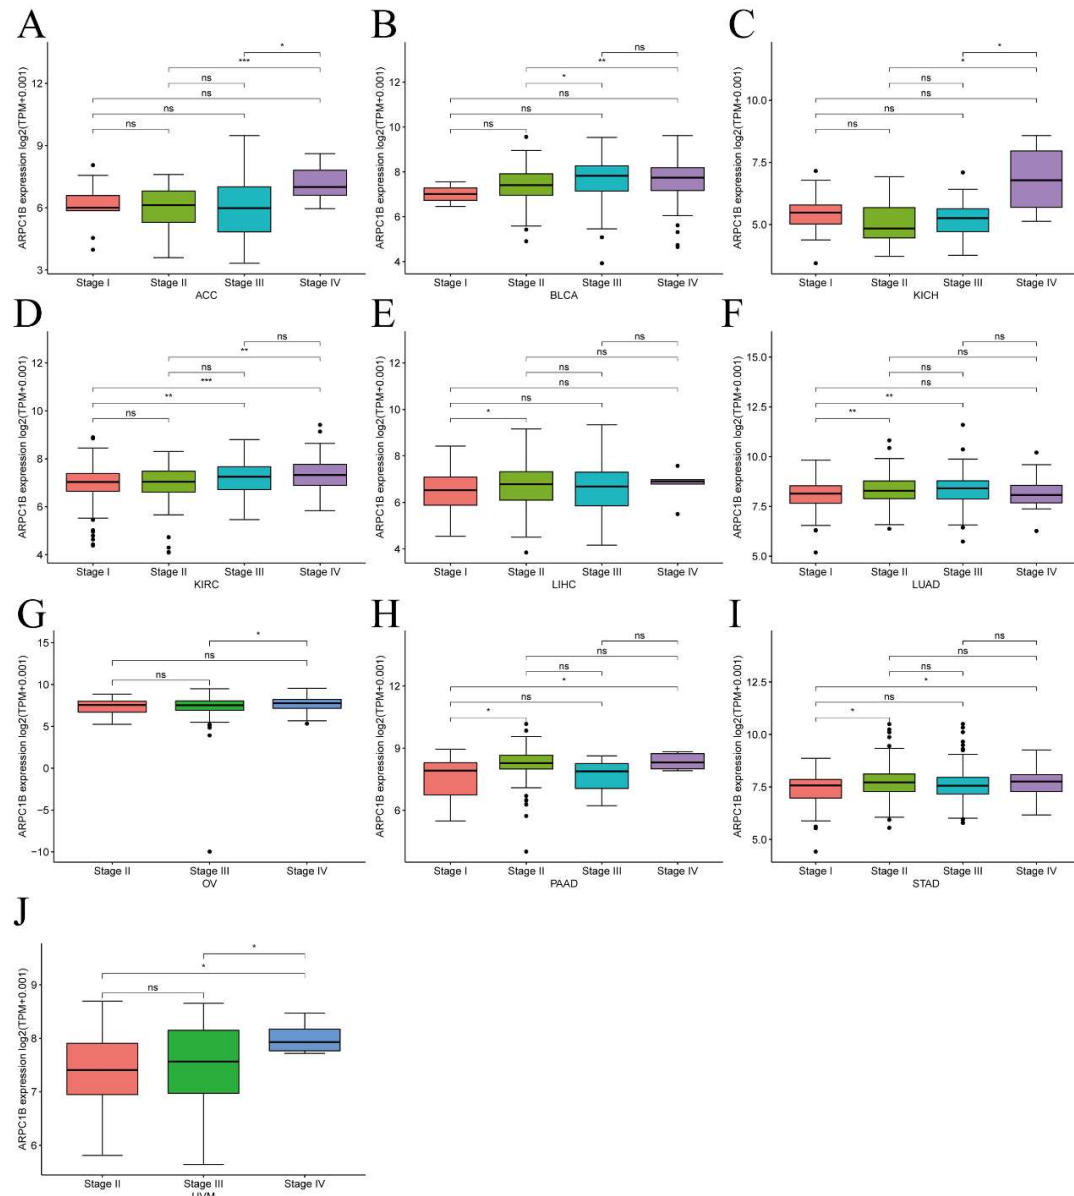

**Supplementary Figure 1:** Correlation of ARPC1B expression and clinicopathological parameters (stage) across different cancer types. (A) ACC. (B) BLCA. (C) KICH. (D) KIRC. (E) LIHC. (F) LUAD. (G) OV. (H) PAAD. (I) STAD. (J) UVM. Significance markers: ns,  $P \geq 0.05$ ; \* $P < 0.05$ ; \*\* $P < 0.01$ ; \*\*\* $P < 0.001$ . ARPC1B: Actin-related protein 2/3 complex subunit 1B; ACC: adrenocortical carcinoma; BLCA: bladder urothelial carcinoma; KICH: kidney chromophobe; KIRC: kidney renal clear cell carcinoma; LIHC: liver hepatocellular carcinoma; LUAD: lung adenocarcinoma; OV: ovarian serous cystadenocarcinoma; PAAD: pancreatic adenocarcinoma; STAD: stomach adenocarcinoma; UVM: uveal melanoma.

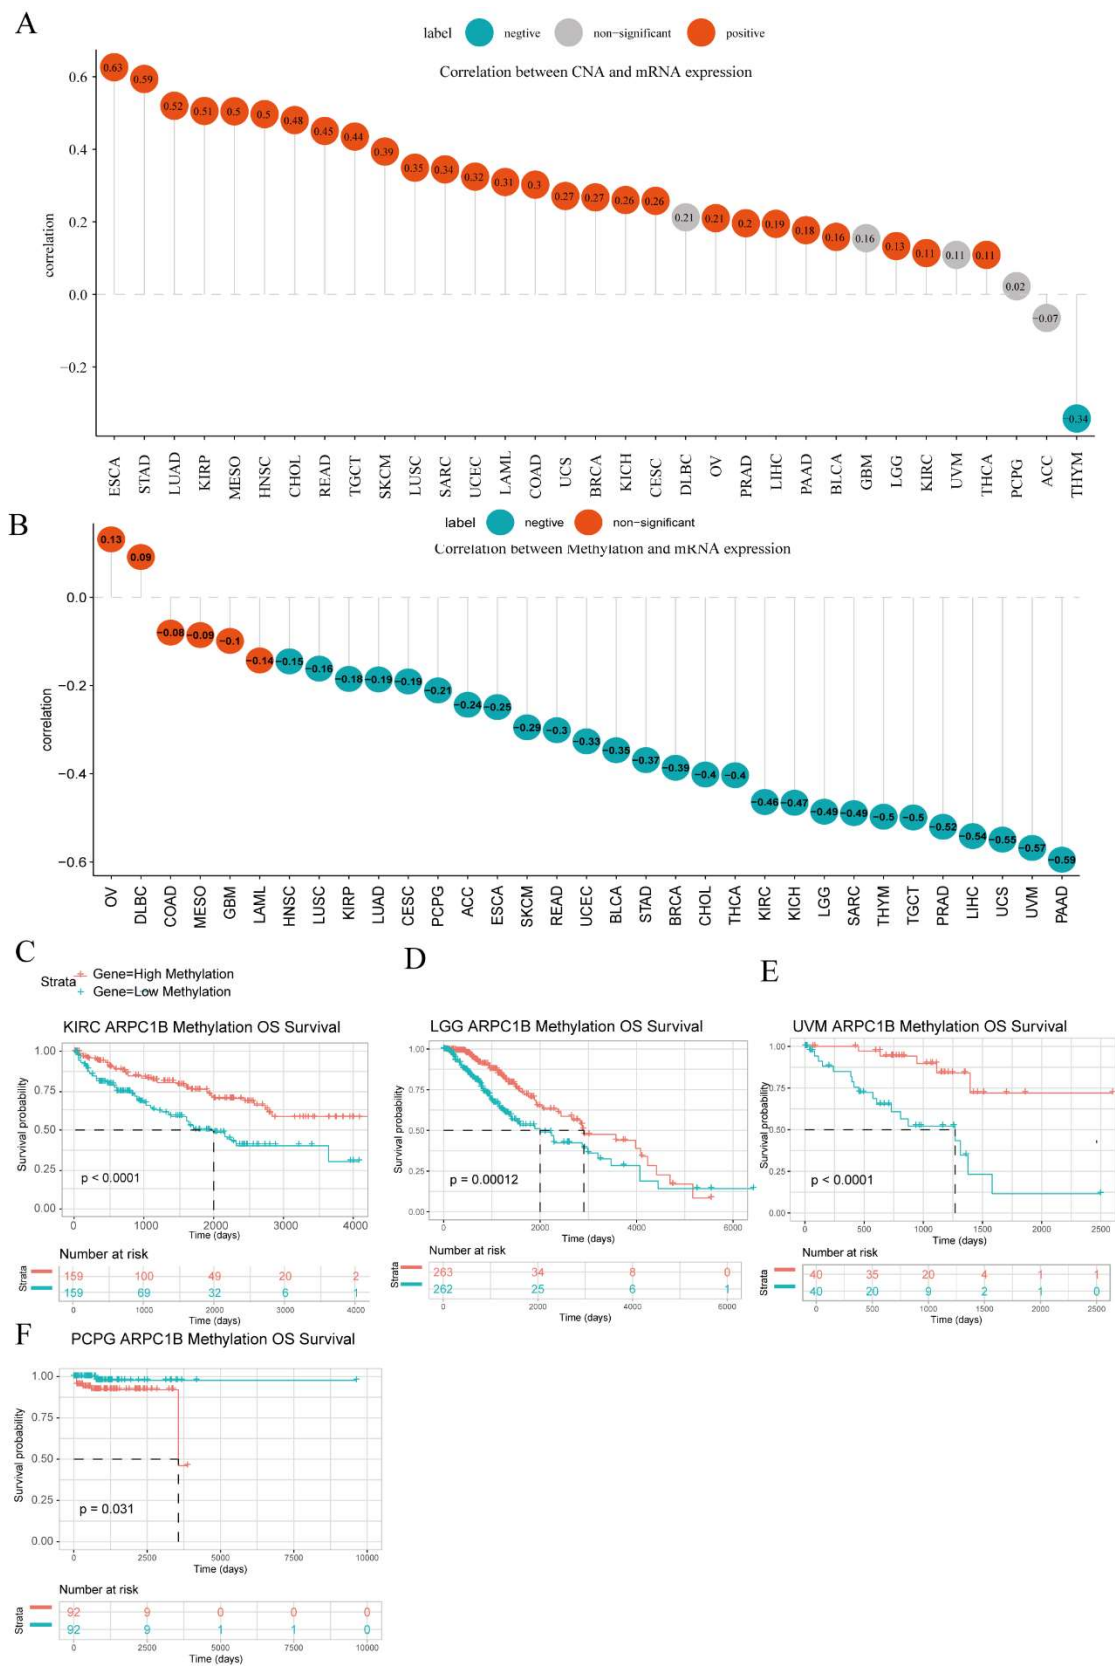

**Supplementary Figure 2:** Analysis of ARPC1B gene's CNA and methylation correlation in pan-cancer and genetic characteristics in specific cancer type. (A) The correlation between ARPC1B

gene and CNA in pan-cancer (various types of cancers). (B) The correlation between ARPC1B gene and methylation levels in pan-cancer. (C) Comparison of Kaplan-Meier survival curves between high and low methylation of ARPC1B in low-grade KIRC. (D) Comparison of Kaplan-Meier survival curves between high and low methylation of ARPC1B in low-grade LGG. (E) Comparison of Kaplan-Meier survival curves between high and low methylation of ARPC1B in low-grade UVM. (F) Comparison of Kaplan-Meier survival curves between high and low methylation of ARPC1B in low-grade PCPG. ARPC1B: Actin-related protein 2/3 complex subunit 1B; ACC: adrenocortical carcinoma; BLCA: bladder urothelial carcinoma; BRCA: breast invasive carcinoma; CESC: cervical squamous cell carcinoma; CHOL: cholangiocarcinoma; COAD: colon adenocarcinoma; DLBC: lymphoid neoplasm diffuses large B cell lymphoma; ESCA: esophageal carcinoma; GBM: glioblastoma multiforme; HNSC: head and neck squamous cell carcinoma; KICH: kidney chromophobe; KIRC: kidney renal clear cell carcinoma; KIRP: kidney renal papillary cell carcinoma; LAML: acute myeloid leukemia; LGG: brain lower grade glioma; LIHC: liver hepatocellular carcinoma; LUAD: lung adenocarcinoma; LUSC: lung squamous cell carcinoma; MESO: mesothelioma; OV: ovarian serous cystadenocarcinoma; PAAD: pancreatic adenocarcinoma; PCPG: pheochromocytoma and paraganglioma; PRAD: prostate adenocarcinoma; READ: rectum adenocarcinoma; SARC: sarcoma; SKCM: skin cutaneous melanoma; STAD: stomach adenocarcinoma; TGCT: testicular germ cell tumors; THCA: thyroid carcinoma; THYM: thymoma; UCEC: uterine corpus endometrial carcinoma; UCS: uterine carcinosarcoma; UVM: uveal melanoma; CNA: copy number alteration.

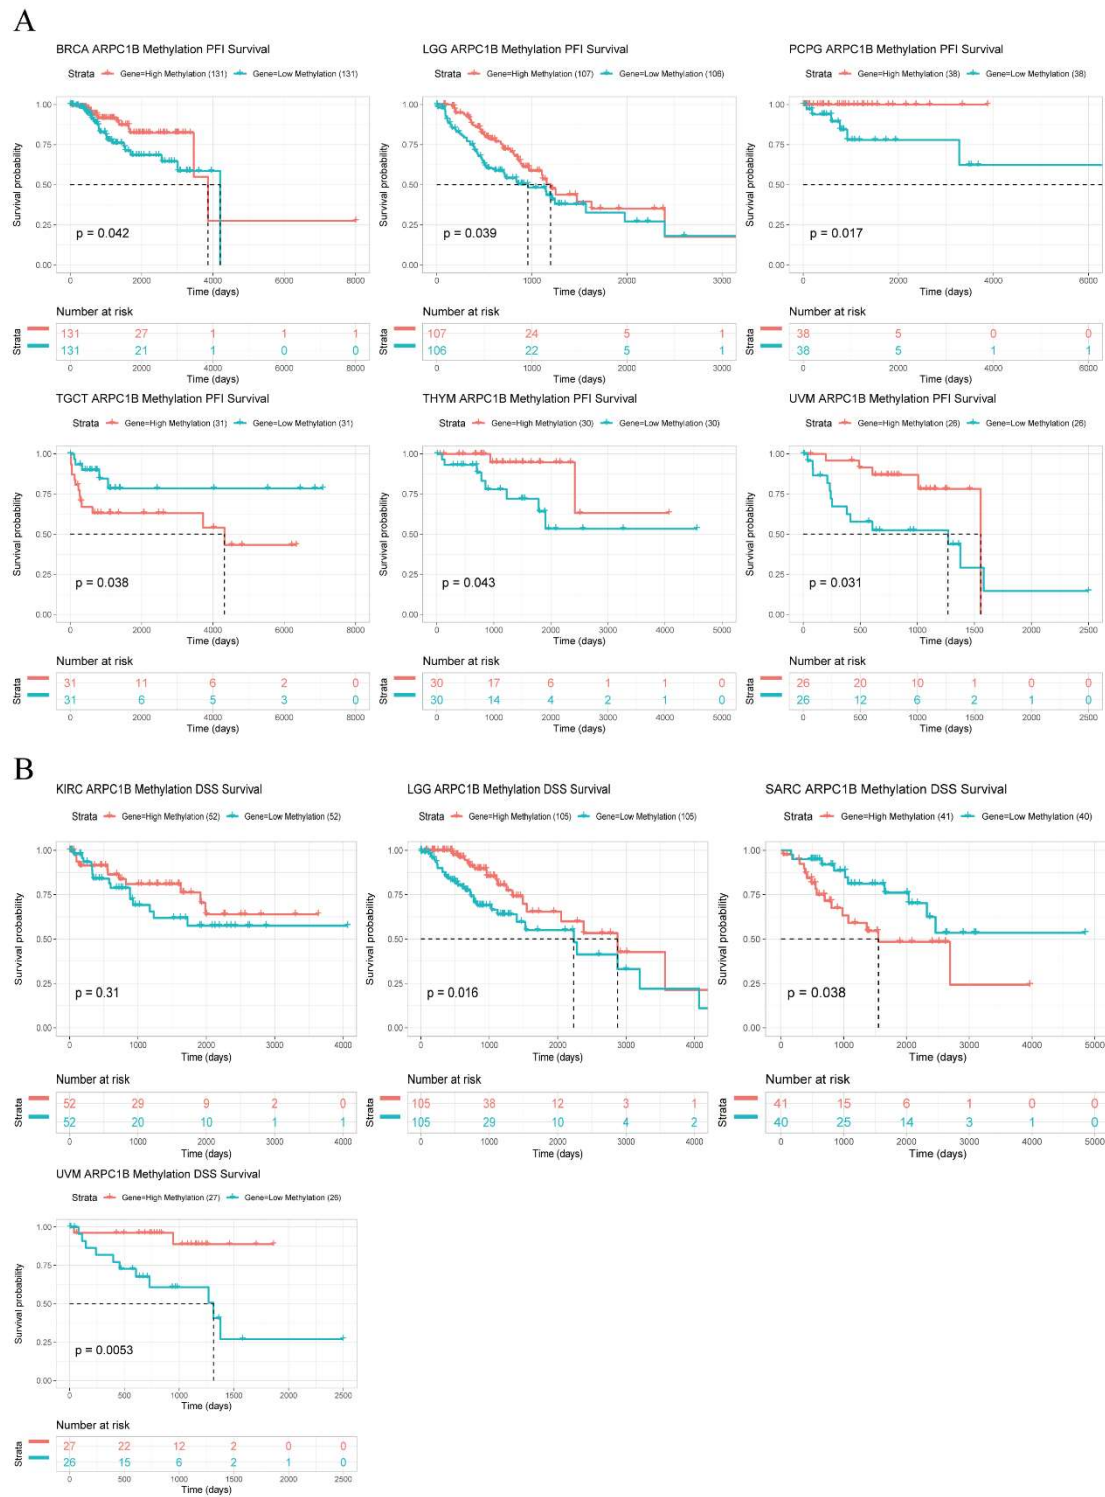

**Supplementary Figure 3:** Prognostic analysis of ARPC1B methylation. (A) Comparison of Kaplan-Meier PFI curves between high and low methylation of ARPC1B. (B) Comparison of Kaplan-Meier DSS curves between high and low methylation of ARPC1B. DSS: disease-specific survival; PFI: progression-free survival; ARPC1B: Actin-related protein 2/3 complex subunit 1B; BRCA: breast invasive carcinoma; KIRC: kidney renal clear cell carcinoma; LGG: brain lower

grade glioma; PCPG: pheochromocytoma and paraganglioma; SARC: sarcoma; TGCT: testicular germ cell tumors; THYM: thymoma; UVM: uveal melanoma.

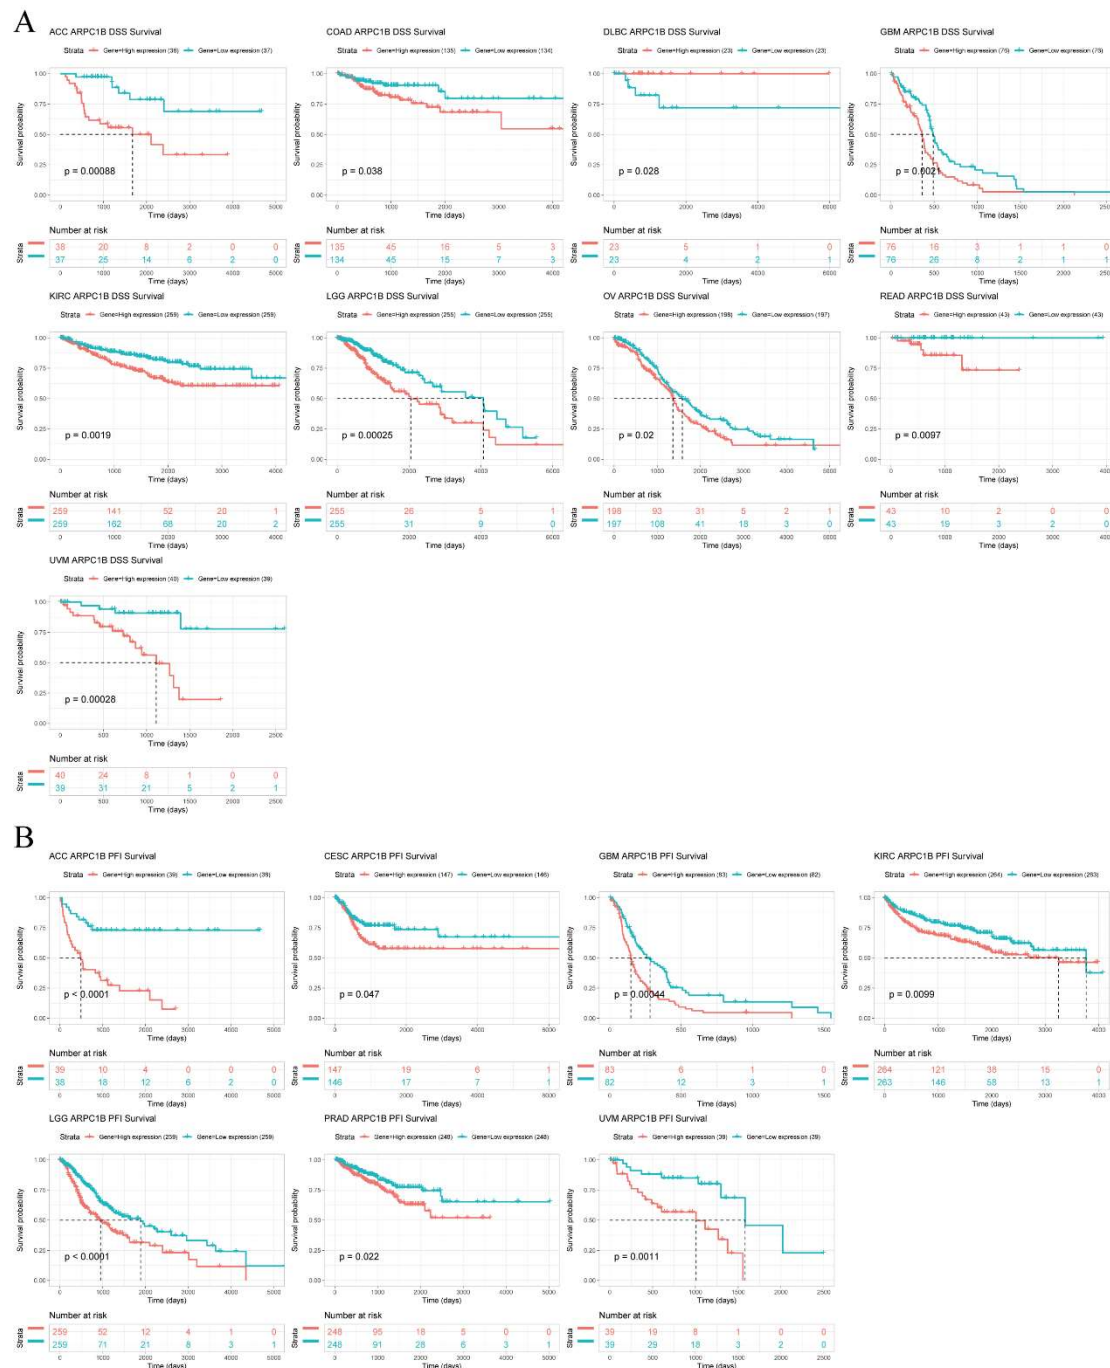

**Supplementary Figure 4: Pan-cancer prognostic analysis of ARPC1B. (A) DSS prognostic analysis of ARPC1B. (B) PFI prognostic analysis of ARPC1B. DSS: disease-specific survival; PFI: progression-free survival; ARPC1B: Actin-related protein 2/3 complex subunit 1B; ACC: adrenocortical carcinoma; CESC: cervical squamous cell carcinoma; COAD: colon**



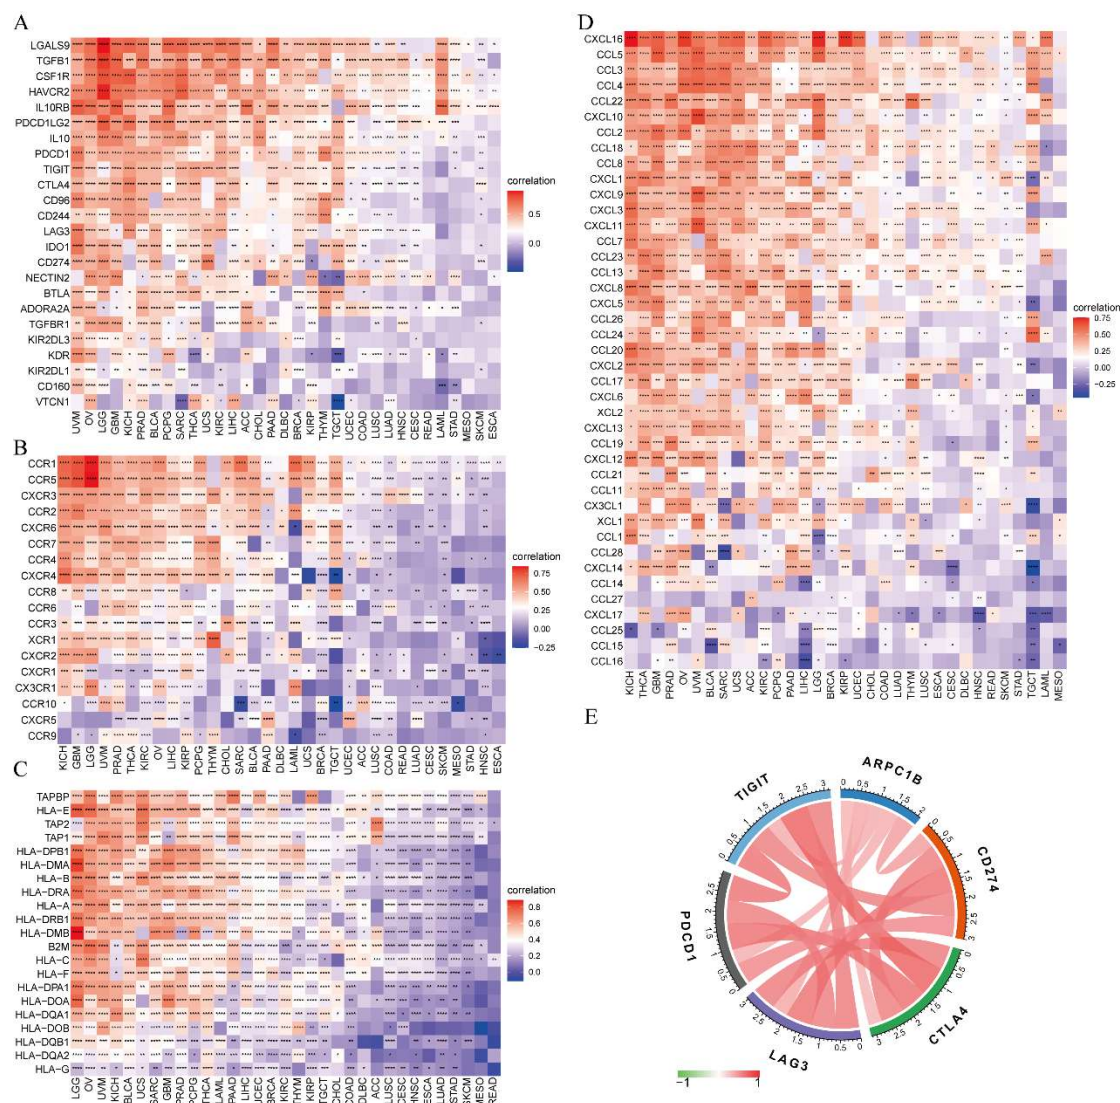

**Supplementary Figure 5:** Analysis of the correlation between ARPC1B and immune suppressive genes as well as immune checkpoint genes. (A) Analysis of the correlation between ARPC1B and immune suppressor genes (various tumor types). (B) Positive correlation between ARPC1B expression and HLA-E and chemokines expression (pan-cancer Perspective). (C) Analysis of the positive correlation between ARPC1B and chemokine receptors expression. (D) Study on the

association between ARPC1B and immune suppression state. (E) Analysis of the correlation between ARPC1B and immune checkpoint genes in OV. OV: ovarian cancer; ARPC1B: Actin-related protein 2/3 complex subunit 1B; ACC: adrenocortical carcinoma; BLCA: bladder urothelial carcinoma; BRCA: breast invasive carcinoma; CESC: cervical squamous cell carcinoma; CHOL: cholangiocarcinoma; COAD: colon adenocarcinoma; DLBC: lymphoid neoplasm diffuses large B cell lymphoma; ESCA: esophageal carcinoma; GBM: glioblastoma multiforme; HNSC: head and neck squamous cell carcinoma; KICH: kidney chromophobe; KIRC: kidney renal clear cell carcinoma; KIRP: kidney renal papillary cell carcinoma; LAML: acute myeloid leukemia; LGG: brain lower grade glioma; LIHC: liver hepatocellular carcinoma; LUAD: lung adenocarcinoma; LUSC: lung squamous cell carcinoma; MESO: mesothelioma; OV: ovarian serous cystadenocarcinoma; PAAD: pancreatic adenocarcinoma; PCPG: pheochromocytoma and paraganglioma; PRAD: prostate adenocarcinoma; READ: rectum adenocarcinoma; SARC: sarcoma; SKCM: skin cutaneous melanoma; STAD: stomach adenocarcinoma; TGCT: testicular germ cell tumors; THCA: thyroid carcinoma; THYM: thymoma; UCEC: uterine corpus endometrial carcinoma; UCS: uterine carcinosarcoma; UVM: uveal melanoma.

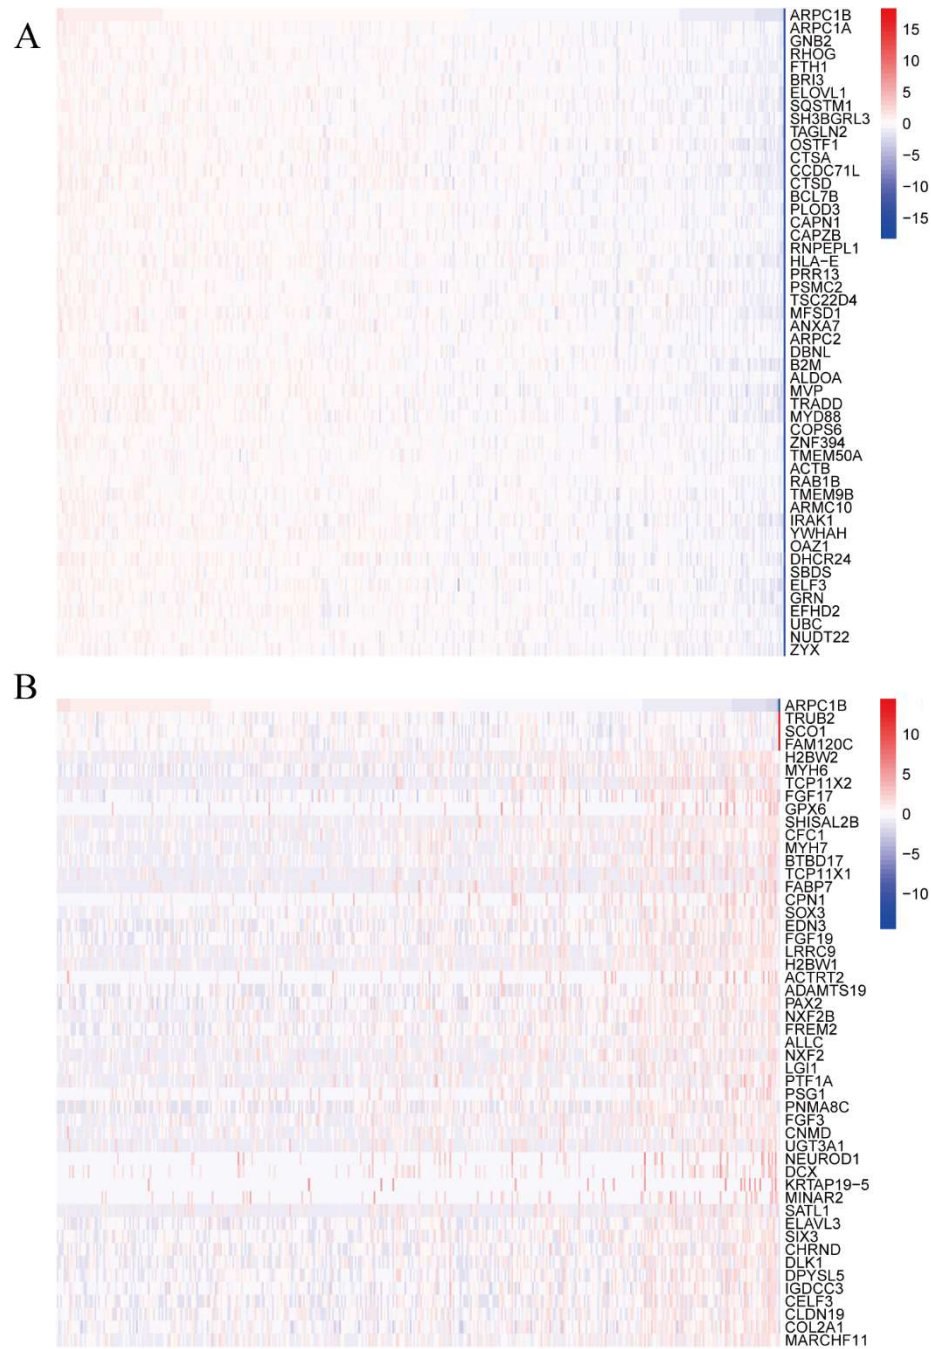

**Supplementary Figure 6:** Gene correlation analysis selected from the TCGA database. (A) Top 50 positively correlated genes selected from the TCGA database. (B) Top 50 negatively correlated genes selected from the TCGA database. TCGA: the cancer genome atlas.



**Supplement Table 1**

| Abbreviations | Full name                                                        |
|---------------|------------------------------------------------------------------|
| ACC           | Adrenocortical carcinoma                                         |
| BLCA          | Bladder urothelial carcinoma                                     |
| BRCA          | Breast invasive carcinoma                                        |
| CESC          | Cervical squamous cell carcinoma and endocervical adenocarcinoma |
| CHOL          | Cholangiocarcinoma                                               |
| COAD          | Colon adenocarcinoma                                             |
| DLBC          | Lymphoid neoplasm diffuse large B-cell lymphoma                  |
| ESCA          | Esophageal carcinoma                                             |
| GBM           | Glioblastoma multiforme                                          |
| HNSC          | Head and neck squamous cell carcinoma                            |
| KICH          | Kidney chromophobe                                               |
| KIRC          | Kidney renal clear cell carcinoma                                |
| KIRP          | Kidney renal papillary cell carcinoma                            |
| LAML          | Acute myeloid leukemia                                           |
| LGG           | Brain lower grade glioma                                         |
| LIHC          | Liver hepatocellular carcinoma                                   |
| LUAD          | Lung adenocarcinoma                                              |
| LUSC          | Lung squamous cell carcinoma                                     |
| MESO          | Mesothelioma                                                     |
| OV            | Ovarian serous cystadenocarcinoma                                |
| PAAD          | Pancreatic adenocarcinoma                                        |
| PCPG          | Pheochromocytoma and paraganglioma                               |
| PRAD          | Prostate adenocarcinoma                                          |
| READ          | Rectum adenocarcinoma                                            |
| SARC          | Sarcoma                                                          |
| SKCM          | Skin cutaneous melanoma                                          |
| STAD          | Stomach adenocarcinoma                                           |
| TGCT          | Testicular germ cell tumor                                       |
| THCA          | Thyroid carcinoma                                                |
| THYM          | Thymoma                                                          |
| UCEC          | Uterine corpus endometrial carcinoma                             |
| UCS           | Uterine carcinosarcoma                                           |
| UVM           | Uveal melanoma                                                   |
